# Supplementary material for: Different dietary restriction regimens extend lifespan by both independent and overlapping genetic pathways in C. elegans
Source: PubMed Central journal article supplement (PMC2680339; doi:10.1111/j.1474-9726.2009.00459.x), 2009-04
Supplement: ace0008-0113-SD4.pdf [file ace0008-0113-SD4.pdf]

| sDR-induced longevity is AMPK/ <i>aak-2</i> dependent                  |                  | 1     | 2                |                   |
|------------------------------------------------------------------------|------------------|-------|------------------|-------------------|
| Strain (bacteria conc. /ml)                                            | Mean +/- SD      | n     | Mean +/- SD      | n                 |
| N2 (5x10 <sup>12</sup> )                                               | 17.260 +/- 0.479 | 82/90 | 22.257 +/- 0.652 | 66/90             |
| N2 (5x10 <sup>11</sup> )                                               | 18.462 +/- 0.630 | 74/90 | 21.369 +/- 0.634 | 57/70             |
| N2 (5x10 <sup>10</sup> )                                               | 19.526 +/- 0.807 | 61/90 | 22.910 +/- 0.634 | 65/90             |
| N2 (5x10 <sup>9</sup> )                                                | 21.940 +/- 0.628 | 68/90 | 25.597 +/- 0.722 | 48/90             |
| N2 (5x10 <sup>8</sup> )                                                | 24.065 +/- 0.773 | 47/90 | 26.641 +/- 0.728 | 48/90             |
| N2 (5x10 <sup>7</sup> )                                                | 18.361 +/- 0.748 | 42/90 | 19.461 +/- 1.673 | 12/75             |
| <i>aak-2(ok524)</i> (5x10 <sup>12</sup> )                              | 15.363 +/- 0.358 | 84/90 | 16.616 +/- 0.615 | 66/90             |
| <i>aak-2(ok524)</i> (5x10 <sup>11</sup> )                              | 14.944 +/- 0.376 | 69/90 | 16.441 +/- 0.459 | 63/67             |
| <i>aak-2(ok524)</i> (5x10 <sup>10</sup> )                              | 14.767 +/- 0.349 | 68/90 | 16.946 +/- 0.428 | 62/90             |
| <i>aak-2(ok524)</i> (5x10 <sup>9</sup> )                               | 14.843 +/- 0.408 | 58/90 | 16.537 +/- 0.415 | 46/90             |
| <i>aak-2(ok524)</i> (5x10 <sup>8</sup> )                               | 14.691 +/- 0.391 | 57/90 | 17.151 +/- 0.440 | 55/90             |
| <i>aak-2(ok524)</i> (5x10 <sup>7</sup> )                               | 14.827 +/- 0.413 | 55/90 | 16.610 +/- 0.756 | 22/70             |
| Statistical comparison                                                 | p values         |       | p values         | Combined p values |
| N2 (5x10 <sup>12</sup> )/N2 (5x10 <sup>11</sup> )                      | 0.0502           |       | 0.2198           | 0.0608            |
| N2 (5x10 <sup>11</sup> )/N2 (5x10 <sup>10</sup> )                      | 0.1439           |       | 0.0564           | 0.0472            |
| N2 (5x10 <sup>11</sup> )/N2 (5x10 <sup>9</sup> )                       | 0.0003           |       | <0.0001          | <0.0001           |
| N2 (5x10 <sup>11</sup> )/N2 (5x10 <sup>8</sup> )                       | <0.0001          |       | <0.0001          | <0.0001           |
| N2 (5x10 <sup>11</sup> )/N2 (5x10 <sup>7</sup> )                       | 0.8426           |       | 0.2145           | 0.4900            |
| <i>aak-2</i> (5x10 <sup>12</sup> )/ <i>aak-2</i> (5x10 <sup>11</sup> ) | 0.4320           |       | 0.9547           | 0.7778            |
| <i>aak-2</i> (5x10 <sup>11</sup> )/ <i>aak-2</i> (5x10 <sup>10</sup> ) | 0.6034           |       | 0.5514           | 0.6988            |
| <i>aak-2</i> (5x10 <sup>11</sup> )/ <i>aak-2</i> (5x10 <sup>9</sup> )  | 0.8143           |       | 0.9244           | 0.9665            |
| <i>aak-2</i> (5x10 <sup>11</sup> )/ <i>aak-2</i> (5x10 <sup>8</sup> )  | 0.5955           |       | 0.3950           | 0.5757            |
| <i>aak-2</i> (5x10 <sup>11</sup> )/ <i>aak-2</i> (5x10 <sup>7</sup> )  | 0.8233           |       | 0.9888           | 0.9815            |
| N2 (5x10 <sup>11</sup> )/ <i>aak-2</i> (5x10 <sup>11</sup> )           | <0.0001          |       | <0.0001          | <0.0001           |
| <i>Interaction between genotype and food concentration</i>             |                  |       |                  |                   |
| Two-way ANOVA N2/ <i>aak-2</i>                                         | <0.0001          |       | <0.0001          | <0.0001           |
| Cox proportional hazard N2/ <i>aak-2</i>                               | <0.0001          |       | <0.0001          | <0.0001           |

## B

| sDR-induced longevity is FoxO/ <i>daf-16</i> dependent                   |                  |       |
|--------------------------------------------------------------------------|------------------|-------|
| Strain (bacteria conc. /ml)                                              | Mean +/- SD      | n     |
| N2 (5x10 <sup>12</sup> )                                                 | 21.836 +/- 0.703 | 77/90 |
| N2 (5x10 <sup>11</sup> )                                                 | 21.982 +/- 0.656 | 72/90 |
| N2 (5x10 <sup>10</sup> )                                                 | 24.042 +/- 0.620 | 85/90 |
| N2 (5x10 <sup>9</sup> )                                                  | 27.084 +/- 0.891 | 57/90 |
| N2 (5x10 <sup>8</sup> )                                                  | 27.600 +/- 0.754 | 75/90 |
| N2 (5x10 <sup>7</sup> )                                                  | 17.659 +/- 1.318 | 33/90 |
| <i>daf-16(mu86)</i> (5x10 <sup>12</sup> )                                | 15.056 +/- 0.321 | 72/90 |
| <i>daf-16(mu86)</i> (5x10 <sup>11</sup> )                                | 15.111 +/- 0.277 | 66/90 |
| <i>daf-16(mu86)</i> (5x10 <sup>10</sup> )                                | 14.834 +/- 0.358 | 56/90 |
| <i>daf-16(mu86)</i> (5x10 <sup>9</sup> )                                 | 15.048 +/- 0.327 | 60/90 |
| <i>daf-16(mu86)</i> (5x10 <sup>8</sup> )                                 | 15.068 +/- 0.395 | 44/90 |
| <i>daf-16(mu86)</i> (5x10 <sup>7</sup> )                                 | 13.495 +/- 0.374 | 44/90 |
| Statistical comparison                                                   | p values         |       |
| N2 (5x10 <sup>12</sup> )/N2 (5x10 <sup>11</sup> )                        | 0.8143           |       |
| N2 (5x10 <sup>11</sup> )/N2 (5x10 <sup>10</sup> )                        | 0.0202           |       |
| N2 (5x10 <sup>11</sup> )/N2 (5x10 <sup>9</sup> )                         | <0.0001          |       |
| N2 (5x10 <sup>11</sup> )/N2 (5x10 <sup>8</sup> )                         | <0.0001          |       |
| N2 (5x10 <sup>11</sup> )/N2 (5x10 <sup>7</sup> )                         | 0.0040           |       |
| <i>daf-16</i> (5x10 <sup>12</sup> )/ <i>daf-16</i> (5x10 <sup>11</sup> ) | 0.9476           |       |
| <i>daf-16</i> (5x10 <sup>11</sup> )/ <i>daf-16</i> (5x10 <sup>10</sup> ) | 0.6192           |       |
| <i>daf-16</i> (5x10 <sup>11</sup> )/ <i>daf-16</i> (5x10 <sup>9</sup> )  | 0.9444           |       |
| <i>daf-16</i> (5x10 <sup>11</sup> )/ <i>daf-16</i> (5x10 <sup>8</sup> )  | 0.7805           |       |
| <i>daf-16</i> (5x10 <sup>11</sup> )/ <i>daf-16</i> (5x10 <sup>7</sup> )  | 0.0008           |       |
| N2 (5x10 <sup>11</sup> )/ <i>daf-16</i> (5x10 <sup>11</sup> )            | <0.0001          |       |
| <i>Interaction between genotype and food concentration</i>               |                  |       |
| Two-way ANOVA N2/ <i>daf-16</i>                                          | <0.0001          |       |
| Cox proportional hazard N2/ <i>daf-16</i>                                | <0.0001          |       |

## sDR extends lifespan in presence of FUdR

| Strain (treatment)                      | Mean +/- SD     | n     |
|-----------------------------------------|-----------------|-------|
| N2 (AL)                                 | 20.756 +/- .298 | 90/90 |
| N2 (sDR)                                | 27.183 +/- .317 | 79/90 |
| <i>aak-2(ok524)</i> (AL)                | 15.047 +/- .323 | 89/90 |
| <i>aak-2(ok524)</i> (sDR)               | 15.400 +/- .365 | 90/90 |
| <i>daf-16(mu86)</i> (AL)                | 15.077 +/- .240 | 89/90 |
| <i>daf-16(mu86)</i> (sDR)               | 15.722 +/- .269 | 89/90 |
| Statistical comparison                  | p values        |       |
| N2 (AL)/N2 (sDR)                        | <0.0001         |       |
| <i>aak-2</i> (AL)/ <i>aak-2</i> (sDR)   | 0.3295          |       |
| <i>daf-16</i> (AL)/ <i>daf-16</i> (sDR) | 0.0624          |       |
| N2 (AL)/ <i>aak-2</i> (AL)              | <0.0001         |       |
| N2 (AL)/ <i>daf-16</i> (AL)             | <0.0001         |       |

Table S1: AMPK/*aak-2* and FoxO/*daf-16* are necessary for lifespan extension by sDR across a gradient of bacteria. A) A serial dilution of bacteria extends WT (N2) worm lifespan but does not extend *aak-2(ok524)* mutant worm lifespan. Experiment #1 is displayed in Figure 1A. Combined p values were calculated using Fisher's combined probability test. B) A serial dilution of bacteria extends WT (N2) worm lifespan but does not extend *daf-16(mu86)* mutant worm lifespan. This experiment is displayed in Figure 1B. C) Addition of FUdR does not alter the dependency of sDR-induced lifespan extension on AMPK/*aak-2* or FoxO/*daf-16*. This experiment is displayed in Figure S1. The mean lifespan values were calculated by a logrank (Mantel-Cox) statistical test from triplicate samples of 30 worms each. n: number of observed dead worms/number of total worms.

Table S2

| Dilution of peptone-induced longevity is <i>aak-2</i> and <i>daf-16</i> dependent |                  | 1     | 2                |                   |
|-----------------------------------------------------------------------------------|------------------|-------|------------------|-------------------|
| Strain (peptone conc. g/l)                                                        | Mean +/- SD      | n     | Mean +/- SD      | n                 |
| N2 (2.5)                                                                          | 18.204 +/- 0.502 | 86/90 | 21.067 +/- 0.513 | 85/90             |
| N2 (0.25)                                                                         | 19.860 +/- 0.509 | 82/90 | 23.421 +/- 0.532 | 87/90             |
| N2 (0.025)                                                                        | 22.365 +/- 0.534 | 69/90 | 24.188 +/- 0.561 | 86/90             |
| N2 (0.0025)                                                                       | 22.888 +/- 0.576 | 65/90 | 26.409 +/- 0.486 | 88/90             |
| <i>aak-2(ok524)</i> (2.5)                                                         | 14.837 +/- 0.388 | 76/90 | 15.128 +/- 0.405 | 89/90             |
| <i>aak-2(ok524)</i> (0.25)                                                        | 14.617 +/- 0.374 | 89/90 | 14.710 +/- 0.352 | 89/90             |
| <i>aak-2(ok524)</i> (0.025)                                                       | 15.084 +/- 0.354 | 89/90 | 15.356 +/- 0.421 | 90/90             |
| <i>aak-2(ok524)</i> (0.0025)                                                      | 15.103 +/- 0.377 | 87/90 | 14.978 +/- 0.377 | 90/90             |
| <i>daf-16(mu86)</i> (2.5)                                                         | 15.743 +/- 0.372 | 86/90 | 15.750 +/- 0.418 | 89/90             |
| <i>daf-16(mu86)</i> (0.25)                                                        | 15.756 +/- 0.352 | 90/90 | 16.356 +/- 0.438 | 90/90             |
| <i>daf-16(mu86)</i> (0.025)                                                       | 16.565 +/- 0.355 | 89/90 | 16.651 +/- 0.457 | 89/90             |
| <i>daf-16(mu86)</i> (0.0025)                                                      | 16.427 +/- 0.361 | 89/90 | 16.644 +/- 0.434 | 90/90             |
| Statistical comparison                                                            | p values         |       | p values         | Combined p values |
| N2 (2.5)/N2 (0.0025)                                                              | <0.0001          |       | <0.0001          | <0.0001           |
| N2 (2.5)/N2 (0.025)                                                               | <0.0001          |       | <0.0001          | <0.0001           |
| N2 (2.5)/N2 (0.25)                                                                | <0.0001          |       | 0.0015           | <0.0001           |
| <i>aak-2</i> (2.5)/ <i>aak-2</i> (0.0025)                                         | 0.6351           |       | 0.6371           | 0.7707            |
| <i>aak-2</i> (2.5)/ <i>aak-2</i> (0.025)                                          | 0.6778           |       | 0.7443           | 0.8497            |
| <i>aak-2</i> (2.5)/ <i>aak-2</i> (0.25)                                           | 0.7021           |       | 0.3337           | 0.5744            |
| <i>daf-16</i> (2.5)/ <i>daf-16</i> (0.0025)                                       | 0.1899           |       | 0.1402           | 0.1232            |
| <i>daf-16</i> (2.5)/ <i>daf-16</i> (0.025)                                        | 0.1637           |       | 0.1191           | 0.0963            |
| <i>daf-16</i> (2.5)/ <i>daf-16</i> (0.25)                                         | 0.9842           |       | 0.3246           | 0.6840            |
| N2 (2.5)/ <i>daf-16</i> (2.5)                                                     | <0.0001          |       | <0.0001          | <0.0001           |
| N2 (2.5)/ <i>aak-2</i> (2.5)                                                      | <0.0001          |       | <0.0001          | <0.0001           |
| N2 (0.0025)/ <i>aak-2</i> (0.0025)                                                | <0.0001          |       | <0.0001          | <0.0001           |
| N2 (0.0025)/ <i>daf-16</i> (0.0025)                                               | <0.0001          |       | <0.0001          | <0.0001           |
| <i>Interaction between genotype and food concentration</i>                        |                  |       |                  |                   |
| Two-way ANOVA N2/ <i>aak-2</i>                                                    | <0.0001          |       | <0.0001          | <0.0001           |
| Two-way ANOVA N2/ <i>daf-16</i>                                                   | <0.0001          |       | <0.0001          | <0.0001           |
| Cox proportional hazard N2/ <i>aak-2</i>                                          | <0.0001          |       | <0.0001          | <0.0001           |
| Cox proportional hazard N2/ <i>daf-16</i>                                         | <0.0001          |       | 0.0001           | <0.0001           |

Table S2: Dilution of peptone (DP) extends lifespan in an AMPK/*aak-2* and FoxO/*daf-16* dependent manner. Experiment #2 is displayed in Figure 2A. The mean lifespan values were calculated by a logrank (Mantel-Cox) statistical test from triplicate samples of 30 worms each. n: number of observed dead worms/number of total worms. Combined p values were calculated using Fisher's combined probability test.

Table S3

| bDR extends worm lifespan                                  |                  |         |                  |       |                  |                          |
|------------------------------------------------------------|------------------|---------|------------------|-------|------------------|--------------------------|
|                                                            | 1                |         | 2                |       | 3                |                          |
| Strain (bacteria conc. /ml)                                | Mean +/- SD      | n       | Mean +/- SD      | n     | Mean +/- SD      | n                        |
| N2 (5x10 <sup>11</sup> )                                   | 21.567 +/- 0.951 | 93/99   | 28.424 +/- 0.886 | 76/87 | 33.514 +/- 1.173 | 87/89                    |
| N2 (1x10 <sup>11</sup> )                                   | 29.952 +/- 0.981 | 70/82   | 43.089 +/- 1.454 | 79/79 | 40.603 +/- 1.311 | 93/94                    |
| N2 (5x10 <sup>10</sup> )                                   | 36.518 +/- 0.804 | 85/89   | 45.221 +/- 1.620 | 82/83 | 44.328 +/- 1.669 | 92/98                    |
| N2 (1.67x10 <sup>10</sup> )                                | 37.911 +/- 1.106 | 83/89   | 41.851 +/- 1.353 | 87/87 | 39.115 +/- 1.406 | 81/82                    |
| N2 (3.33x10 <sup>9</sup> )                                 | 43.466 +/- 1.334 | 79/91   | 40.311 +/- 1.356 | 74/74 | 38.459 +/- 1.316 | 88/89                    |
| <i>aak-2(ok524)</i> (5x10 <sup>11</sup> )                  | 19.683 +/- 0.635 | 98/110  | 22.449 +/- 0.673 | 84/96 | 30.486 +/- 0.841 | 60/81                    |
| <i>aak-2(ok524)</i> (1x10 <sup>11</sup> )                  | 25.400 +/- 0.600 | 88/90   | 25.472 +/- 1.052 | 78/79 | 31.920 +/- 0.890 | 87/87                    |
| <i>aak-2(ok524)</i> (5x10 <sup>10</sup> )                  | 27.781 +/- 0.719 | 81/89   | 28.596 +/- 0.640 | 74/78 | 36.832 +/- 0.896 | 80/82                    |
| <i>aak-2(ok524)</i> (1.67x10 <sup>10</sup> )               | 25.513 +/- 0.760 | 82/91   | 23.753 +/- 0.911 | 65/71 | 33.903 +/- 0.844 | 84/86                    |
| <i>aak-2(ok524)</i> (3.33x10 <sup>9</sup> )                | 28.989 +/- 0.593 | 87/88   | 23.850 +/- 0.895 | 68/75 | 32.776 +/- 0.927 | 85/85                    |
| <i>daf-16(mu86)</i> (5x10 <sup>11</sup> )                  | 20.497 +/- 0.424 | 103/106 | 21.817 +/- 1.062 | 46/49 | 27.062 +/- 0.838 | 78/81                    |
| <i>daf-16(mu86)</i> (1x10 <sup>11</sup> )                  | 22.474 +/- 0.564 | 85/88   | 22.109 +/- 1.214 | 50/51 | 32.473 +/- 0.951 | 93/94                    |
| <i>daf-16(mu86)</i> (5x10 <sup>10</sup> )                  | 24.504 +/- 0.591 | 85/88   | 24.997 +/- 0.993 | 65/72 | 34.286 +/- 1.045 | 92/98                    |
| <i>daf-16(mu86)</i> (1.67x10 <sup>10</sup> )               | 24.785 +/- 0.497 | 85/89   | 21.955 +/- 0.775 | 67/67 | 30.791 +/- 0.878 | 81/82                    |
| <i>daf-16(mu86)</i> (3.33x10 <sup>9</sup> )                | 28.619 +/- 0.424 | 78/88   | 21.822 +/- 1.021 | 53/62 | 29.452 +/- 0.964 | 90/94                    |
| <b>Statistical comparison</b>                              | <b>p values</b>  |         | <b>p values</b>  |       | <b>p values</b>  | <b>Combined p values</b> |
| N2 (AL)/N2 (DR)                                            | <0.0001          |         | <0.0001          |       | <0.0001          | <0.0001                  |
| <i>aak-2</i> (AL)/ <i>aak-2</i> (DR)                       | <0.0001          |         | <0.0001          |       | <0.0001          | <0.0001                  |
| <i>daf-16</i> (AL)/ <i>daf-16</i> (DR)                     | <0.0001          |         | 0.0120           |       | <0.0001          | <0.0001                  |
| <i>Interaction between genotype and food concentration</i> |                  |         |                  |       |                  |                          |
| Two-way ANOVA N2/ <i>aak-2</i>                             | <0.0001          |         | <0.0001          |       | 0.1528           | <0.0001                  |
| Two-way ANOVA N2/ <i>daf-16</i>                            | <0.0001          |         | <0.0001          |       | 0.6643           | <0.0001                  |
| Cox proportional hazard N2/ <i>aak-2</i>                   | <0.0001          |         | 0.0299           |       | 0.2490           | <0.0001                  |
| Cox proportional hazard N2/ <i>daf-16</i>                  | <0.0001          |         | 0.0024           |       | 0.9500           | <0.0001                  |

Table S3: bDR increase in worm lifespan is partially dependent on AMPK/*aak-2* and FoxO/*daf-16*. The average of these three experiments is displayed in Figure 2B. Each experiment is displayed in Figure S2. The mean lifespan values were calculated by a logrank (Mantel-Cox) statistical test from quadruplicate samples of ~22 worms each. n: number of observed dead worms/number of total worms. Combined p values were calculated using Fisher's combined probability test.

## A

Table S4

| <i>eat-2</i> longevity is independent of AMPK/ <i>aak-2</i> |                 |       |                  |                   |
|-------------------------------------------------------------|-----------------|-------|------------------|-------------------|
|                                                             | 1               |       | 2                |                   |
| Strain (treatment)                                          | Mean +/- SD     | n     | Mean +/- SD      | n                 |
| N2 (AL)                                                     | 21.699 +/- .553 | 86/90 | 17.887 +/- .341  | 78/90             |
| N2 (sDR)                                                    | 25.639 +/- .687 | 71/90 | 23.676 +/- .590  | 44/90             |
| <i>aak-2(ok524)</i> (AL)                                    | 17.581 +/- .461 | 88/90 | 14.788 +/- .286  | 68/90             |
| <i>aak-2(ok524)</i> (sDR)                                   | 17.819 +/- .449 | 85/90 | 15.029 +/- .304  | 69/90             |
| <i>eat-2(ad1116)</i> (AL)                                   | 25.993 +/- .705 | 84/90 | 21.097 +/- .688  | 44/90             |
| <i>eat-2(ad1116)</i> (sDR)                                  | 30.682 +/- .813 | 65/90 | 28.053 +/- 1.212 | 22/90             |
| <i>eat-2(ad1116); aak-2(ok524)</i> (AL)                     | 20.983 +/- .569 | 76/90 | 18.359 +/- .336  | 73/90             |
| <i>eat-2(ad1116); aak-2(ok524)</i> (sDR)                    | 20.827 +/- .530 | 76/90 | 18.566 +/- .427  | 53/90             |
| Statistical comparison                                      | p values        |       | p values         | Combined p values |
| N2 (AL)/N2 (sDR)                                            | <0.0001         |       | <0.0001          | <0.0001           |
| <i>eat-2</i> (AL)/ <i>eat-2</i> (sDR)                       | <0.0001         |       | <0.0001          | <0.0001           |
| <i>aak-2</i> (AL)/ <i>aak-2</i> (sDR)                       | 0.8252          |       | 0.5985           | 0.8423            |
| <i>eat-2; aak-2</i> (AL)/ <i>eat-2; aak-2</i> (sDR)         | 0.7449          |       | 0.7531           | 0.8853            |
| N2 (AL)/ <i>eat-2</i> (AL)                                  | <0.0001         |       | 0.0002           | <0.0001           |
| N2 (AL)/ <i>aak-2</i> (AL)                                  | <0.0001         |       | <0.0001          | <0.0001           |
| N2 (AL)/ <i>eat-2; aak-2</i> (AL)                           | 0.4351          |       | 0.3245           | 0.4176            |
| N2 (sDR)/ <i>eat-2</i> (sDR)                                | <0.0001         |       | 0.0034           | <0.0001           |
| N2 (sDR)/ <i>aak-2</i> (sDR)                                | <0.0001         |       | <0.0001          | <0.0001           |
| N2 (sDR)/ <i>eat-2; aak-2</i> (sDR)                         | <0.0001         |       | <0.0001          | <0.0001           |
| <i>eat-2</i> (AL)/ <i>eat-2; aak-2</i> (AL)                 | <0.0001         |       | 0.0064           | <0.0001           |
| <i>eat-2</i> (sDR)/ <i>eat-2; aak-2</i> (sDR)               | <0.0001         |       | <0.0001          | <0.0001           |
| <i>aak-2</i> (AL)/ <i>eat-2; aak-2</i> (AL)                 | <0.0001         |       | <0.0001          | <0.0001           |
| <i>aak-2</i> (sDR)/ <i>eat-2; aak-2</i> (sDR)               | <0.0001         |       | <0.0001          | <0.0001           |

## B

| <i>eat-2</i> longevity is independent of FoxO/ <i>daf-16</i> |                |       |                |                   |
|--------------------------------------------------------------|----------------|-------|----------------|-------------------|
|                                                              | 1              |       | 2              |                   |
| Strain (treatment)                                           | Mean +/- SD    | n     | Mean +/- SD    | n                 |
| N2 (AL)                                                      | 21.39 +/- 0.75 | 88/90 | 20.36 +/- 0.45 | 87/90             |
| N2 (sDR)                                                     | 26.11 +/- 0.53 | 83/90 | 26.10 +/- 0.64 | 54/90             |
| <i>eat-2(ad1116)</i> (AL)                                    | 24.15 +/- 0.58 | 86/90 | 22.21 +/- 0.59 | 77/90             |
| <i>eat-2(ad1116)</i> (sDR)                                   | 27.16 +/- 0.66 | 64/90 | 26.39 +/- 0.72 | 68/90             |
| <i>daf-16(mu86)</i> (AL)                                     | 16.53 +/- 0.33 | 90/90 | 14.71 +/- 0.29 | 87/90             |
| <i>daf-16(mu86)</i> (sDR)                                    | 17.16 +/- 0.38 | 89/90 | 15.34 +/- 0.35 | 82/90             |
| <i>eat-2(ad1116); daf-16(mu86)</i> (AL)                      | 21.87 +/- 0.55 | 86/90 | 17.67 +/- 0.46 | 83/90             |
| <i>eat-2(ad1116); daf-16(mu86)</i> (sDR)                     | 21.81 +/- 0.52 | 86/90 | 17.70 +/- 0.50 | 82/90             |
| Statistical comparison                                       | p values       |       | p values       | Combined p values |
| N2 (AL)/N2 (sDR)                                             | <0.0001        |       | <0.0001        | <0.0001           |
| <i>eat-2</i> (AL)/ <i>eat-2</i> (sDR)                        | 0.0010         |       | <0.0001        | <0.0001           |
| <i>daf-16</i> (AL)/ <i>daf-16</i> (sDR)                      | 0.1948         |       | 0.0798         | 0.0803            |
| <i>eat-2; daf-16</i> (AL)/ <i>eat-2; daf-16</i> (sDR)        | 0.9574         |       | 0.7979         | 0.9696            |
| N2 (AL)/ <i>eat-2</i> (AL)                                   | <0.0001        |       | 0.0007         | <0.0001           |
| N2 (AL)/ <i>daf-16</i> (AL)                                  | <0.0001        |       | <0.0001        | <0.0001           |
| N2 (AL)/ <i>eat-2; daf-16</i> (AL)                           | 0.1480         |       | <0.0001        | 0.0002            |
| N2 (sDR)/ <i>eat-2</i> (sDR)                                 | 0.1179         |       | 0.3430         | 0.1702            |
| N2 (sDR)/ <i>daf-16</i> (sDR)                                | <0.0001        |       | <0.0001        | <0.0001           |
| N2 (sDR)/ <i>eat-2; daf-16</i> (sDR)                         | <0.0001        |       | <0.0001        | <0.0001           |
| <i>eat-2</i> (AL)/ <i>eat-2; daf-16</i> (AL)                 | 0.0059         |       | <0.0001        | <0.0001           |
| <i>eat-2</i> (sDR)/ <i>eat-2; daf-16</i> (sDR)               | <0.0001        |       | <0.0001        | <0.0001           |
| <i>daf-16</i> (AL)/ <i>eat-2; daf-16</i> (AL)                | <0.0001        |       | <0.0001        | <0.0001           |
| <i>daf-16</i> (sDR)/ <i>eat-2; daf-16</i> (sDR)              | <0.0001        |       | <0.0001        | <0.0001           |

Table S4: A) *eat-2(ad1116)* induced lifespan extension is independent of AMPK/*aak-2*. Experiment #1 is displayed in Figure 2C. Experiment #2 is displayed in Figure 6. B) *eat-2(ad1116)* induced lifespan extension is independent of FoxO/*daf-16*. Experiment #2 is displayed in Figure 2D. The mean lifespan values were calculated by a logrank (Mantel-Cox) statistical test from triplicate samples of 30 worms each. n: number of observed dead worms/number of total worms. Combined p values were calculated using Fisher's combined probability test.

Table S5

| Resveratrol extends worm lifespan          |                 |       |                 |       |                 |                   |
|--------------------------------------------|-----------------|-------|-----------------|-------|-----------------|-------------------|
|                                            | 1               |       | 2               |       | 3               |                   |
| Strain (Resveratrol conc.)                 | Mean +/- SD     | n     | Mean +/- SD     | n     | Mean +/- SD     | n                 |
| N2 (0μM)                                   | 20.161 +/- .528 | 89/90 | 18.393 +/- .448 | 81/90 | 21.615 +/- .535 | 89/90             |
| N2 (20μM)                                  | 21.845 +/- .503 | 89/90 | 21.461 +/- .484 | 76/90 |                 |                   |
| N2 (100μM)                                 | 23.028 +/- .537 | 84/90 | 21.698 +/- .486 | 71/90 | 24.774 +/- .575 | 88/90             |
| N2 (500μM)                                 | 22.219 +/- .540 | 76/90 | 21.627 +/- .495 | 75/90 |                 |                   |
| <i>aak-2(ok524)</i> (0μM)                  | 15.042 +/- .348 | 75/90 | 15.043 +/- .262 | 84/90 | 17.174 +/- .417 | 84/90             |
| <i>aak-2(ok524)</i> (20μM)                 | 14.464 +/- .367 | 73/90 | 15.897 +/- .297 | 87/90 |                 |                   |
| <i>aak-2(ok524)</i> (100μM)                | 15.370 +/- .383 | 64/90 | 15.375 +/- .316 | 82/90 | 15.686 +/- .381 | 75/90             |
| <i>aak-2(ok524)</i> (500μM)                | 14.662 +/- .429 | 41/90 | 15.561 +/- .288 | 83/90 |                 |                   |
| <i>daf-16(mu86)</i> (0μM)                  |                 |       |                 |       | 15.083 +/- .319 | 84/90             |
| <i>daf-16(mu86)</i> (100μM)                |                 |       |                 |       | 17.151 +/- .379 | 85/90             |
| Statistical comparison                     | p values        |       | p values        |       | p values        | Combined p values |
| N2 (0μM)/N2 (20μM)                         | 0.0484          |       | <0.0001         |       |                 | <0.0001           |
| N2 (0μM)/N2 (100μM)                        | 0.0005          |       | <0.0001         |       | <0.0001         | <0.0001           |
| N2 (0μM)/N2 (500μM)                        | 0.0159          |       | <0.0001         |       |                 | <0.0001           |
| <i>aak-2</i> (0μM)/ <i>aak-2</i> (20μM)    | 0.3095          |       | 0.0225          |       |                 | 0.0416            |
| <i>aak-2</i> (0μM)/ <i>aak-2</i> (100μM)   | 0.5485          |       | 0.2290          |       | 0.0096          | 0.0366            |
| <i>aak-2</i> (0μM)/ <i>aak-2</i> (500μM)   | 0.5031          |       | 0.1126          |       |                 | 0.2193            |
| <i>daf-16</i> (0μM)/ <i>daf-16</i> (100μM) |                 |       |                 |       | <0.0001         |                   |
| N2 (0μM)/ <i>aak-2</i> (0μM)               | <0.0001         |       | <0.0001         |       | <0.0001         | <0.0001           |
| N2 (0μM)/ <i>daf-16</i> (0μM)              |                 |       |                 |       | <0.0001         |                   |

Table S5: Resveratrol increases worm lifespan in an AMPK/*aak-2* dependent but FoxO/*daf-16* independent manner. Experiment #2 is displayed in Figure 3A. Experiment #3 is displayed in Figure 3B. The mean lifespan values were calculated by a logrank (Mantel-Cox) statistical test from triplicate samples of 30 worms each. n: number of observed dead worms/number of total worms. Combined p values were calculated using Fisher's combined probability test.

Table S6

| sDR-induced longevity is <i>sir-2.1</i> independent                       |                  |       |                  |       |                  |                          |
|---------------------------------------------------------------------------|------------------|-------|------------------|-------|------------------|--------------------------|
|                                                                           | 1                |       | 2                |       | 3                |                          |
| Strain (bacteria conc. /ml)                                               | Mean +/- SD      | n     | Mean +/- SD      | n     | Mean +/- SD      | n                        |
| N2 (5x10 <sup>12</sup> )                                                  |                  |       |                  |       | 17.364 +/- 0.425 | 83/90                    |
| N2 (5x10 <sup>11</sup> )                                                  | 19.041 +/- 0.566 | 84/90 | 19.041 +/- 0.546 | 85/90 | 17.139 +/- 0.445 | 72/90                    |
| N2 (5x10 <sup>10</sup> )                                                  |                  |       |                  |       | 18.129 +/- 0.539 | 66/90                    |
| N2 (5x10 <sup>9</sup> )                                                   |                  |       |                  |       | 20.301 +/- 0.589 | 62/90                    |
| N2 (5x10 <sup>8</sup> )                                                   | 24.860 +/- 0.713 | 79/90 | 21.598 +/- 0.598 | 79/90 | 21.609 +/- 0.667 | 49/90                    |
| N2 (5x10 <sup>7</sup> )                                                   |                  |       |                  |       | 16.329 +/- 0.557 | 66/90                    |
| <i>aak-2(ok524)</i> (5x10 <sup>12</sup> )                                 |                  |       |                  |       | 14.881 +/- 0.386 | 70/90                    |
| <i>aak-2(ok524)</i> (5x10 <sup>11</sup> )                                 |                  |       |                  |       | 14.971 +/- 0.389 | 68/90                    |
| <i>aak-2(ok524)</i> (5x10 <sup>10</sup> )                                 |                  |       |                  |       | 15.329 +/- 0.439 | 53/90                    |
| <i>aak-2(ok524)</i> (5x10 <sup>9</sup> )                                  |                  |       |                  |       | 15.572 +/- 0.436 | 49/90                    |
| <i>aak-2(ok524)</i> (5x10 <sup>8</sup> )                                  |                  |       |                  |       | 15.162 +/- 0.414 | 69/90                    |
| <i>aak-2(ok524)</i> (5x10 <sup>7</sup> )                                  |                  |       |                  |       | 14.077 +/- 0.432 | 55/90                    |
| <i>sir-2.1(ok434)</i> (5x10 <sup>12</sup> )                               |                  |       |                  |       | 18.148 +/- 0.471 | 86/90                    |
| <i>sir-2.1(ok434)</i> (5x10 <sup>11</sup> )                               | 19.423 +/- 0.382 | 76/90 | 17.812 +/- 0.344 | 76/90 | 18.138 +/- 0.473 | 79/90                    |
| <i>sir-2.1(ok434)</i> (5x10 <sup>10</sup> )                               |                  |       |                  |       | 18.301 +/- 0.427 | 78/90                    |
| <i>sir-2.1(ok434)</i> (5x10 <sup>9</sup> )                                |                  |       |                  |       | 19.179 +/- 0.527 | 66/90                    |
| <i>sir-2.1(ok434)</i> (5x10 <sup>8</sup> )                                | 21.075 +/- 0.513 | 61/90 | 18.752 +/- 0.376 | 62/90 | 21.147 +/- 0.552 | 61/90                    |
| <i>sir-2.1(ok434)</i> (5x10 <sup>7</sup> )                                |                  |       |                  |       | 18.017 +/- 0.612 | 53/90                    |
| <b>Statistical comparison</b>                                             | <b>p values</b>  |       | <b>p values</b>  |       | <b>p values</b>  | <b>Combined p values</b> |
| N2 (5x10 <sup>11</sup> )/N2 (5x10 <sup>8</sup> )                          | <0.0001          |       | 0.0019           |       | <0.0001          | <0.0001                  |
| <i>aak-2</i> (5x10 <sup>11</sup> )/ <i>aak-2</i> (5x10 <sup>8</sup> )     |                  |       |                  |       | 0.6330           |                          |
| <i>sir-2.1</i> (5x10 <sup>11</sup> )/ <i>sir-2.1</i> (5x10 <sup>8</sup> ) | 0.0214           |       | 0.0821           |       | <0.0001          | <0.0001                  |
| N2 (5x10 <sup>11</sup> )/ <i>aak-2</i> (5x10 <sup>11</sup> )              |                  |       |                  |       | 0.0002           |                          |
| N2 (5x10 <sup>11</sup> )/ <i>sir-2.1</i> (5x10 <sup>11</sup> )            | 0.4583           |       | 0.0097           |       | 0.1111           | 0.0185                   |
| <i>Interaction between genotype and food concentration</i>                |                  |       |                  |       |                  |                          |
| Two-way ANOVA N2/ <i>aak-2</i>                                            |                  |       |                  |       | <0.0001          |                          |
| Two-way ANOVA N2/ <i>sir-2.1</i>                                          | 0.0002           |       | 0.0925           |       | 0.1240           | 0.0002                   |
| Cox proportional hazard N2/ <i>aak-2</i>                                  |                  |       |                  |       | 0.0080           |                          |
| Cox proportional hazard N2/ <i>sir-2.1</i>                                |                  |       |                  |       | 0.5322           |                          |

Table S6: sDR increases worm lifespan in an AMPK/*aak-2* dependent and SIR2/*sir-2.1* independent manner. Experiment #3 is displayed in Figure 4A. The mean lifespan values were calculated by a logrank (Mantel-Cox) statistical test from triplicate samples of 30 worms each. n: number of observed dead worms/number of total worms. Combined p values were calculated using Fisher's combined probability test.

| sDR-induced longevity is <i>pha-4</i> independent                                   |                    | 1        | 2                  |                          |
|-------------------------------------------------------------------------------------|--------------------|----------|--------------------|--------------------------|
| <b>Strain (bacteria conc. /ml)</b>                                                  | <b>Mean +/- SD</b> | <b>n</b> | <b>Mean +/- SD</b> | <b>n</b>                 |
| <i>smg-1(cc546ts)</i> (5x10 <sup>12</sup> )                                         | 25.675 +/- 0.930   | 60/90    | 19.789 +/- 0.530   | 90/90                    |
| <i>smg-1(cc546ts)</i> (5x10 <sup>11</sup> )                                         | 27.348 +/- 0.854   | 80/90    | 21.240 +/- 0.556   | 85/90                    |
| <i>smg-1(cc546ts)</i> (5x10 <sup>10</sup> )                                         | 31.601 +/- 1.040   | 72/90    | 25.141 +/- 1.004   | 61/90                    |
| <i>smg-1(cc546ts)</i> (5x10 <sup>9</sup> )                                          | 33.103 +/- 1.395   | 51/90    | 28.454 +/- 1.046   | 59/90                    |
| <i>smg-1(cc546ts)</i> (5x10 <sup>8</sup> )                                          | 32.241 +/- 1.114   | 54/90    | 22.518 +/- 0.993   | 68/90                    |
| <i>smg-1(cc546ts)</i> (5x10 <sup>7</sup> )                                          | 23.566 +/- 1.139   | 60/90    | 20.306 +/- 0.819   | 72/90                    |
| <i>smg-1(cc546ts); pha-4(zu225)</i> (5x10 <sup>12</sup> )                           | 24.306 +/- 0.748   | 77/90    | 19.434 +/- 0.441   | 88/90                    |
| <i>smg-1(cc546ts); pha-4(zu225)</i> (5x10 <sup>11</sup> )                           | 24.834 +/- 0.682   | 79/90    | 20.231 +/- 0.607   | 87/90                    |
| <i>smg-1(cc546ts); pha-4(zu225)</i> (5x10 <sup>10</sup> )                           | 27.006 +/- 1.193   | 50/90    | 24.957 +/- 0.842   | 72/90                    |
| <i>smg-1(cc546ts); pha-4(zu225)</i> (5x10 <sup>9</sup> )                            | 28.521 +/- 0.834   | 75/90    | 27.987 +/- 1.213   | 41/90                    |
| <i>smg-1(cc546ts); pha-4(zu225)</i> (5x10 <sup>8</sup> )                            | 27.745 +/- 1.073   | 55/90    | 19.448 +/- 0.686   | 57/90                    |
| <i>smg-1(cc546ts); pha-4(zu225)</i> (5x10 <sup>7</sup> )                            | 18.534 +/- 0.775   | 61/90    | 18.068 +/- 0.625   | 58/90                    |
| <b>Statistical comparison</b>                                                       | <b>p values</b>    |          | <b>p values</b>    | <b>Combined p values</b> |
| <i>smg-1</i> (5x10 <sup>12</sup> )/ <i>smg-1</i> (5x10 <sup>9</sup> )               | <0.0001            |          | <0.0001            | <0.0001                  |
| <i>smg-1; pha-4</i> (5x10 <sup>12</sup> )/ <i>smg-1; pha-4</i> (5x10 <sup>9</sup> ) | <0.0001            |          | <0.0001            | <0.0001                  |
| <i>smg-1</i> (5x10 <sup>12</sup> )/ <i>smg-1; pha-4</i> (5x10 <sup>12</sup> )       | 0.1674             |          | 0.3623             | 0.2307                   |
| <i>Interaction between genotype and food concentration</i>                          |                    |          |                    |                          |
| Two-way ANOVA <i>smg-1</i> /s <i>mg-1; pha-4</i>                                    | 0.3724             |          | 0.3927             | 0.4052                   |
| Cox proportional hazard <i>smg-1</i> /s <i>mg-1; pha-4</i>                          | 0.1537             |          | 0.1573             | 0.1142                   |

## B

| RNAi initiated at                                  |                 | L4              |                          | L1              |                 |                          |
|----------------------------------------------------|-----------------|-----------------|--------------------------|-----------------|-----------------|--------------------------|
| Experiment #                                       |                 | 1               | 2                        | 1               | 2               |                          |
| <b>Strain</b>                                      | <b>RNAi</b>     | <b>Food</b>     | <b>Mean +/- SD</b>       |                 |                 |                          |
| N2                                                 | E.V.            | AL              | 20.908 +/- .591          | 20.683 +/- .611 | 18.414 +/- .450 | 18.878 +/- .607          |
| N2                                                 | E.V.            | sDR             | 25.492 +/- .614          | 27.062 +/- .833 | 24.812 +/- .629 | 23.970 +/- .616          |
| N2                                                 | <i>daf-16</i>   | AL              | 17.876 +/- .359          | 18.518 +/- .493 | 16.769 +/- .393 | 15.512 +/- .325          |
| N2                                                 | <i>daf-16</i>   | sDR             | 18.522 +/- .387          | 19.654 +/- .711 | 17.938 +/- .423 | 15.743 +/- .343          |
| N2                                                 | <i>pha-4</i>    | AL              | 18.011 +/- .440          | 19.420 +/- .627 | 14.422 +/- .304 | 9.889 +/- .324           |
| N2                                                 | <i>pha-4</i>    | sDR             | 20.642 +/- .448          | 24.539 +/- .650 | 19.726 +/- .510 | 12.348 +/- .656          |
| <i>eat-2</i>                                       | E.V.            | AL              |                          | 22.039 +/- .691 | 22.127 +/- .580 | 20.728 +/- .696          |
| <i>eat-2</i>                                       | <i>pha-4</i>    | AL              |                          | 19.881 +/- .619 | 20.748 +/- .632 | 12.906 +/- .490          |
| <b>Statistical comparison</b>                      | <b>p values</b> | <b>p values</b> | <b>Combined p values</b> | <b>p values</b> | <b>p values</b> | <b>Combined p values</b> |
| N2 E.V. AL/N2 E.V. sDR                             | <0.0001         | <0.0001         | <0.0001                  | <0.0001         | <0.0001         | <0.0001                  |
| N2 E.V. AL/N2 <i>pha-4</i> AL                      | <0.0001         | 0.1882          | 0.0002                   | <0.0001         | <0.0001         | <0.0001                  |
| N2 E.V. AL/N2 <i>daf-16</i> AL                     | <0.0001         | 0.0031          | <0.0001                  | 0.0044          | <0.0001         | <0.0001                  |
| N2 E.V. AL/ <i>eat-2</i> E.V. AL                   |                 | 0.1199          |                          | <0.0001         | 0.0080          | <0.0001                  |
| N2 <i>pha-4</i> AL/N2 <i>pha-4</i> sDR             | <0.0001         | <0.0001         | <0.0001                  | <0.0001         | 0.0004          | <0.0001                  |
| N2 <i>daf-16</i> AL/N2 <i>daf-16</i> sDR           | 0.1559          | 0.1801          | 0.1284                   | 0.1562          | 0.4930          | 0.2744                   |
| <i>eat-2</i> E.V. AL/ <i>eat-2</i> <i>pha-4</i> AL |                 | 0.0353          |                          | 0.2460          | <0.0001         | 0.0003                   |

Table S7: sDR increases worm lifespan in a *FoxA/pha-4* independent manner. A) *smg-1* and *smg-1; pha-4* worms were grown at permissive temperature (24° C) until the first day of adulthood when they were switched to 15° C. Experiment #1 is displayed in Figure 4B. B) sDR extends the lifespan of WT(N2) worms treated with empty vector RNAi (E.V.) or *pha-4* RNAi but not *daf-16* RNAi initiated at larval stage L1 or larval stage L4. L1 Experiment #1 is displayed in Figure S3A. L4 Experiment #2 is displayed in Figure S3B. The mean lifespan values were calculated by a logrank (Mantel-Cox) statistical test from triplicate samples of 30 worms each. n: number of observed dead worms/number of total worms. Combined p values were calculated using Fisher's combined probability test.



Table S8

| sDR-induced longevity is <i>skn-1</i> independent                     |                  |       |                  |                          |
|-----------------------------------------------------------------------|------------------|-------|------------------|--------------------------|
|                                                                       | 1                |       | 2                |                          |
| Strain (bacteria conc. /ml)                                           | Mean +/- SD      | n     | Mean +/- SD      | n                        |
| N2 (5x10 <sup>12</sup> )                                              |                  |       | 19.387 +/- 0.639 | 81/90                    |
| N2 (5x10 <sup>11</sup> )                                              | 20.230 +/- 0.538 | 59/90 | 19.069 +/- 0.626 | 76/90                    |
| N2 (5x10 <sup>10</sup> )                                              |                  |       | 21.752 +/- 0.762 | 69/90                    |
| N2 (5x10 <sup>9</sup> )                                               |                  |       | 22.709 +/- 1.015 | 46/90                    |
| N2 (5x10 <sup>8</sup> )                                               | 25.448 +/- 0.666 | 39/90 | 23.820 +/- 1.023 | 40/90                    |
| N2 (5x10 <sup>7</sup> )                                               |                  |       | 20.450 +/- 0.974 | 27/90                    |
| <i>aak-2(rr48)</i> (5x10 <sup>12</sup> )                              |                  |       | 17.341 +/- 0.484 | 80/90                    |
| <i>aak-2(rr48)</i> (5x10 <sup>11</sup> )                              | 16.521 +/- 0.447 | 61/90 | 17.083 +/- 0.452 | 70/90                    |
| <i>aak-2(rr48)</i> (5x10 <sup>10</sup> )                              |                  |       | 17.854 +/- 0.602 | 66/90                    |
| <i>aak-2(rr48)</i> (5x10 <sup>9</sup> )                               |                  |       | 16.622 +/- 0.886 | 35/90                    |
| <i>aak-2(rr48)</i> (5x10 <sup>8</sup> )                               | 16.911 +/- 0.593 | 43/90 | 17.869 +/- 0.834 | 34/90                    |
| <i>aak-2(rr48)</i> (5x10 <sup>7</sup> )                               |                  |       | 16.535 +/- 1.074 | 29/90                    |
| <i>skn-1(zu135)</i> (5x10 <sup>12</sup> )                             |                  |       | 15.544 +/- 0.358 | 80/90                    |
| <i>skn-1(zu135)</i> (5x10 <sup>11</sup> )                             | 18.547 +/- 0.510 | 56/90 | 16.734 +/- 0.449 | 75/90                    |
| <i>skn-1(zu135)</i> (5x10 <sup>10</sup> )                             |                  |       | 17.220 +/- 0.502 | 69/90                    |
| <i>skn-1(zu135)</i> (5x10 <sup>9</sup> )                              |                  |       | 19.921 +/- 0.718 | 50/90                    |
| <i>skn-1(zu135)</i> (5x10 <sup>8</sup> )                              | 22.450 +/- 0.575 | 43/90 | 20.606 +/- 0.663 | 58/90                    |
| <i>skn-1(zu135)</i> (5x10 <sup>7</sup> )                              |                  |       | 18.600 +/- 1.199 | 29/90                    |
| <b>Statistical comparison</b>                                         | <b>p values</b>  |       | <b>p values</b>  | <b>Combined p values</b> |
| N2 (5x10 <sup>11</sup> )/N2 (5x10 <sup>8</sup> )                      | <0.0001          |       | <0.0001          | <0.0001                  |
| <i>aak-2</i> (5x10 <sup>11</sup> )/ <i>aak-2</i> (5x10 <sup>8</sup> ) | 0.4891           |       | 0.2566           | 0.3860                   |
| <i>skn-1</i> (5x10 <sup>11</sup> )/ <i>skn-1</i> (5x10 <sup>8</sup> ) | <0.0001          |       | <0.0001          | <0.0001                  |
| N2 (5x10 <sup>11</sup> )/ <i>aak-2</i> (5x10 <sup>11</sup> )          | <0.0001          |       | 0.0049           | <0.0001                  |
| N2 (5x10 <sup>11</sup> )/ <i>skn-1</i> (5x10 <sup>11</sup> )          | 0.0174           |       | 0.0008           | 0.0002                   |
| <i>Interaction between genotype and food concentration</i>            |                  |       |                  |                          |
| Two-way ANOVA N2/ <i>aak-2</i>                                        |                  |       | <0.0001          |                          |
| Two-way ANOVA N2/ <i>skn-1</i>                                        |                  |       | 0.5567           |                          |
| Cox proportional hazard N2/ <i>aak-2</i>                              |                  |       | 0.0205           |                          |
| Cox proportional hazard N2/ <i>skn-1</i>                              |                  |       | 0.7570           |                          |

Table S8: sDR increases worm lifespan in an AMPK/*aak-2* dependent, *skn-1* independent manner. Experiment #2 is displayed in Figure 4C. The mean lifespan values were calculated by a logrank (Mantel-Cox) statistical test from triplicate samples of 30 worms each. n: number of observed dead worms/number of total worms. Combined p values were calculated using Fisher's combined probability test.

| sDR-induced longevity is <i>hsf-1</i> independent and <i>clk-1</i> dependent        |                  | 1     | 2                |                   |
|-------------------------------------------------------------------------------------|------------------|-------|------------------|-------------------|
| Strain (bacteria conc. /ml)                                                         | Mean +/- SD      | n     | Mean +/- SD      | n                 |
| N2 (5x10 <sup>12</sup> )                                                            | 16.695 +/- 0.429 | 72/90 | 19.387 +/- 0.639 | 81/90             |
| N2 (5x10 <sup>11</sup> )                                                            | 16.714 +/- 0.517 | 65/90 | 19.069 +/- 0.626 | 76/90             |
| N2 (5x10 <sup>10</sup> )                                                            | 17.772 +/- 0.526 | 60/90 | 21.752 +/- 0.762 | 69/90             |
| N2 (5x10 <sup>9</sup> )                                                             | 19.627 +/- 0.584 | 59/90 | 22.709 +/- 1.015 | 46/90             |
| N2 (5x10 <sup>8</sup> )                                                             | 21.482 +/- 0.596 | 45/90 | 23.820 +/- 1.023 | 40/90             |
| N2 (5x10 <sup>7</sup> )                                                             | 18.269 +/- 0.726 | 31/90 | 20.450 +/- 0.974 | 27/90             |
| <i>aak-2(ok524)</i> (5x10 <sup>12</sup> )                                           | 13.976 +/- 0.345 | 77/90 |                  |                   |
| <i>aak-2(ok524)</i> (5x10 <sup>11</sup> )                                           | 13.879 +/- 0.351 | 64/90 |                  |                   |
| <i>aak-2(ok524)</i> (5x10 <sup>10</sup> )                                           | 13.775 +/- 0.310 | 75/90 |                  |                   |
| <i>aak-2(ok524)</i> (5x10 <sup>9</sup> )                                            | 13.897 +/- 0.368 | 65/90 |                  |                   |
| <i>aak-2(ok524)</i> (5x10 <sup>8</sup> )                                            | 13.683 +/- 0.419 | 58/90 |                  |                   |
| <i>aak-2(ok524)</i> (5x10 <sup>7</sup> )                                            | 13.910 +/- 0.397 | 62/90 |                  |                   |
| <i>aak-2(rr48)</i> (5x10 <sup>12</sup> )                                            | 13.786 +/- 0.334 | 86/90 | 17.341 +/- 0.484 | 80/90             |
| <i>aak-2(rr48)</i> (5x10 <sup>11</sup> )                                            | 13.584 +/- 0.306 | 89/90 | 17.083 +/- 0.452 | 70/90             |
| <i>aak-2(rr48)</i> (5x10 <sup>10</sup> )                                            | 13.871 +/- 0.306 | 85/90 | 17.854 +/- 0.602 | 66/90             |
| <i>aak-2(rr48)</i> (5x10 <sup>9</sup> )                                             | 14.125 +/- 0.344 | 82/90 | 16.622 +/- 0.886 | 35/90             |
| <i>aak-2(rr48)</i> (5x10 <sup>8</sup> )                                             | 13.723 +/- 0.354 | 87/90 | 17.869 +/- 0.834 | 34/90             |
| <i>aak-2(rr48)</i> (5x10 <sup>7</sup> )                                             | 14.604 +/- 0.377 | 73/90 | 16.535 +/- 1.074 | 29/90             |
| <i>clk-1(e2519)</i> (5x10 <sup>12</sup> )                                           | 23.536 +/- 0.754 | 72/90 | 22.373 +/- 0.765 | 72/90             |
| <i>clk-1(e2519)</i> (5x10 <sup>11</sup> )                                           | 22.638 +/- 0.773 | 65/90 | 22.326 +/- 0.823 | 62/90             |
| <i>clk-1(e2519)</i> (5x10 <sup>10</sup> )                                           | 23.387 +/- 0.688 | 67/90 | 22.695 +/- 0.788 | 63/90             |
| <i>clk-1(e2519)</i> (5x10 <sup>9</sup> )                                            | 23.120 +/- 0.809 | 38/90 | 24.115 +/- 0.905 | 48/90             |
| <i>clk-1(e2519)</i> (5x10 <sup>8</sup> )                                            | 22.627 +/- 0.834 | 41/90 | 23.041 +/- 0.853 | 48/90             |
| <i>clk-1(e2519)</i> (5x10 <sup>7</sup> )                                            | 20.100 +/- 1.214 | 23/90 | 22.763 +/- 0.928 | 39/90             |
| <i>hsf-1(sy441)</i> (5x10 <sup>12</sup> )                                           | 12.698 +/- 0.330 | 60/90 | 12.463 +/- 0.353 | 68/90             |
| <i>hsf-1(sy441)</i> (5x10 <sup>11</sup> )                                           | 12.444 +/- 0.296 | 60/90 | 12.075 +/- 0.379 | 68/90             |
| <i>hsf-1(sy441)</i> (5x10 <sup>10</sup> )                                           | 13.201 +/- 0.463 | 48/90 | 12.241 +/- 0.404 | 64/90             |
| <i>hsf-1(sy441)</i> (5x10 <sup>9</sup> )                                            | 14.327 +/- 0.440 | 43/90 | 14.842 +/- 0.550 | 23/90             |
| <i>hsf-1(sy441)</i> (5x10 <sup>8</sup> )                                            | 14.419 +/- 0.492 | 36/90 | 16.125 +/- 0.933 | 24/90             |
| <i>hsf-1(sy441)</i> (5x10 <sup>7</sup> )                                            | 12.517 +/- 0.476 | 26/90 | 10.962 +/- 0.684 | 22/90             |
| Statistical comparison                                                              | p values         |       | p values         | Combined p values |
| N2 (5x10 <sup>11</sup> )/N2 (5x10 <sup>8</sup> )                                    | <0.0001          |       | <0.0001          | <0.0001           |
| <i>aak-2(ok524)</i> (5x10 <sup>11</sup> )/ <i>aak-2(ok524)</i> (5x10 <sup>8</sup> ) | 0.7804           |       |                  |                   |
| <i>aak-2(rr48)</i> (5x10 <sup>11</sup> )/ <i>aak-2(rr48)</i> (5x10 <sup>8</sup> )   | 0.5787           |       | 0.2566           | 0.4318            |
| <i>clk-1</i> (5x10 <sup>11</sup> )/ <i>clk-1</i> (5x10 <sup>8</sup> )               | 0.6921           |       | 0.6303           | 0.7982            |
| <i>hsf-1</i> (5x10 <sup>11</sup> )/ <i>hsf-1</i> (5x10 <sup>8</sup> )               | 0.0003           |       | <0.0001          | <0.0001           |
| N2 (5x10 <sup>11</sup> )/ <i>aak-2(ok524)</i> (5x10 <sup>11</sup> )                 | <0.0001          |       |                  |                   |
| N2 (5x10 <sup>11</sup> )/ <i>aak-2(rr48)</i> (5x10 <sup>11</sup> )                  | <0.0001          |       | 0.0049           | <0.0001           |
| N2 (5x10 <sup>11</sup> )/ <i>clk-1</i> (5x10 <sup>11</sup> )                        | <0.0001          |       | 0.0014           | <0.0001           |
| N2 (5x10 <sup>11</sup> )/ <i>hsf-1</i> (5x10 <sup>11</sup> )                        | <0.0001          |       | <0.0001          | <0.0001           |
| <i>Interaction between genotype and food concentration</i>                          |                  |       |                  |                   |
| Two-way ANOVA N2/ <i>aak-2(ok524)</i>                                               | <0.0001          |       |                  |                   |
| Two-way ANOVA N2/ <i>aak-2(rr48)</i>                                                | <0.0001          |       | 0.0318           | <0.0001           |
| Two-way ANOVA N2/ <i>clk-1</i>                                                      | <0.0001          |       | <0.0001          | <0.0001           |
| Two-way ANOVA N2/ <i>hsf-1</i>                                                      | 0.0253           |       | 0.2843           | 0.0427            |
| Cox proportional hazard N2/ <i>aak-2(ok524)</i>                                     | <0.0001          |       |                  |                   |
| Cox proportional hazard N2/ <i>aak-2(rr48)</i>                                      | 0.0012           |       | 0.0205           | 0.0003            |
| Cox proportional hazard N2/ <i>clk-1</i>                                            | <0.0001          |       | 0.0085           | <0.0001           |
| Cox proportional hazard N2/ <i>hsf-1</i>                                            | 0.1290           |       | 0.6568           | 0.2938            |

Table S9: sDR increases worm lifespan in an AMPK/*aak-2* and *clk-1* dependent, *hsf-1* independent manner. Experiment #2 is displayed in Figure 4C. Experiment #1 is displayed in Figure 5. The mean lifespan values were calculated by a logrank (Mantel-Cox) statistical test from triplicate samples of 30 worms each. n: number of observed dead worms/number of total worms. Combined p values were calculated using Fisher's combined probability test. Note that experiment #2 of Table S9 was performed at the same time as experiment #2 of Table S8.
